# Supplementary material for: Bisamide based non-nucleophilic electrolytes for rechargeable magnesium batteries
Source: Royal Society of Chemistry journal article supplement (doi:10.1039/c3ra43206h), 2013-01-01

## Electronic Supplementary Information (ESI)

### Bisamide based Non-nucleophilic Electrolytes for Rechargeable Magnesium Batteries

Zhirong Zhao-Karger,<sup>\*a</sup> Xiangyu Zhao,<sup>a</sup> Olaf Fuhr,<sup>a</sup> and Maximilian Fichtner<sup>a,b</sup>

<sup>a</sup>Karlsruhe Institute of Technology (KIT), Institute of Nanotechnology, P.O. Box 3640, D-76021  
Karlsruhe, Germany E-mail: zhirong.zhao-karger@kit.edu

<sup>b</sup>Helmholtz Institute Ulm (HIU), Ulm University, D-89069 Ulm, Germany

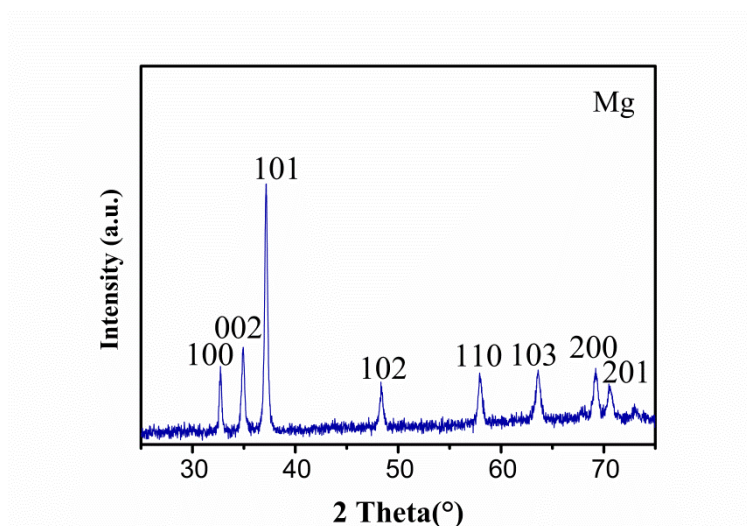

Fig. S1 XRD pattern of magnesium deposited on platinum.

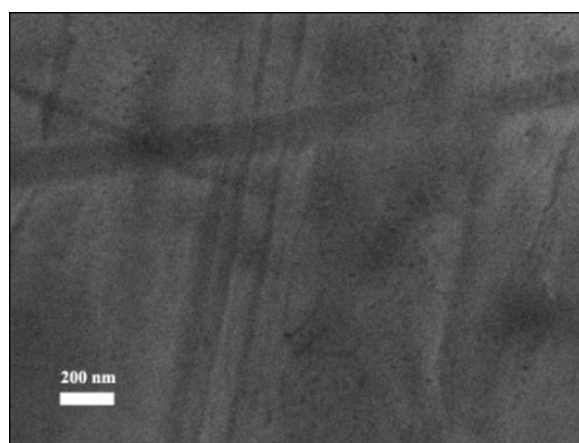

Fig.S2 SEM image of magnesium deposit after 60 cycles.

\* The strips were caused by the glass fibres of the separator in the cell.

## NMR spectra

<sup>1</sup>H NMR (HMDS)2Mg

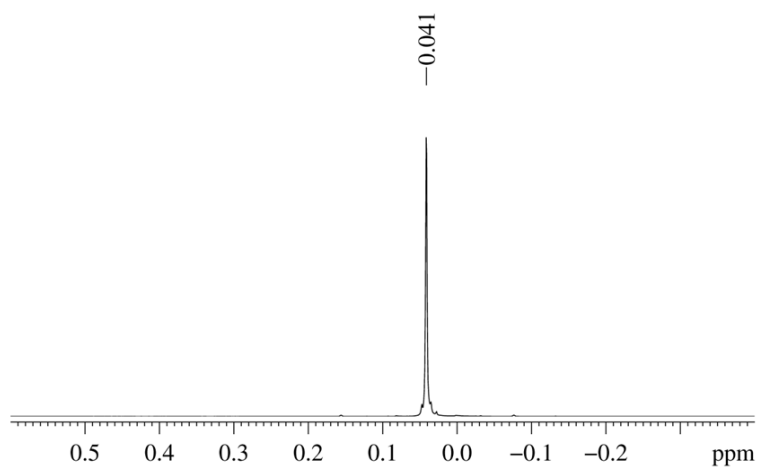

<sup>13</sup>C NMR (HMDS)2Mg

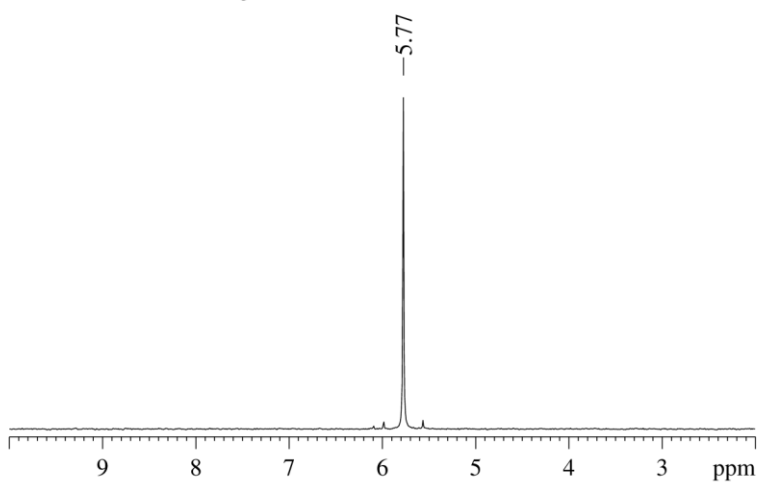

$^1\text{H}$  NMR 2(HMDS) $_2\text{Mg}-\text{AlCl}_3-\text{THF}$

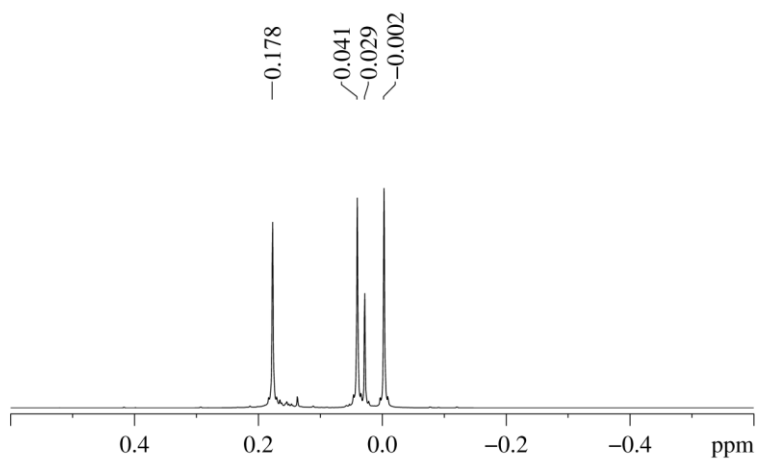

$^{13}\text{C}$  NMR 2(HMDS) $_2\text{Mg}-\text{AlCl}_3-\text{THF}$

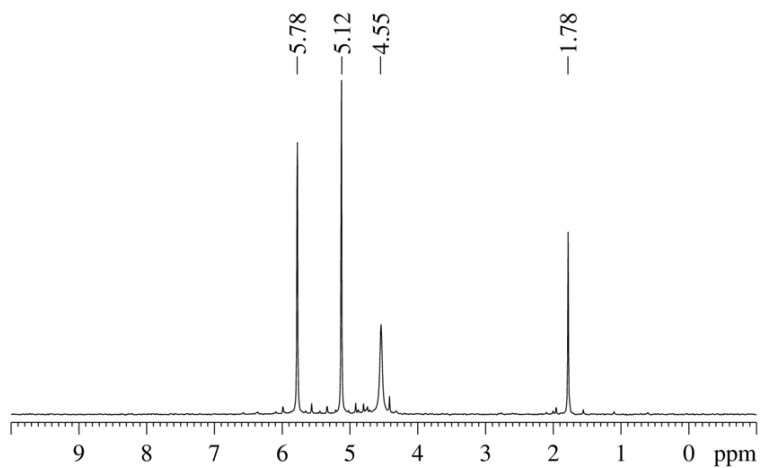

$^1\text{H}$  NMR (HMDS) $_2\text{Mg}-\text{AlCl}_3-\text{THF}$

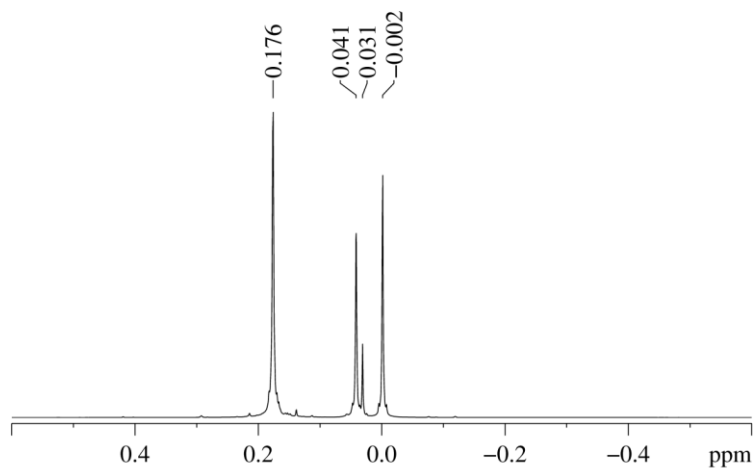

$^{13}\text{C}$  NMR (HMDS) $2\text{Mg}-\text{AlCl}_3-\text{THF}$

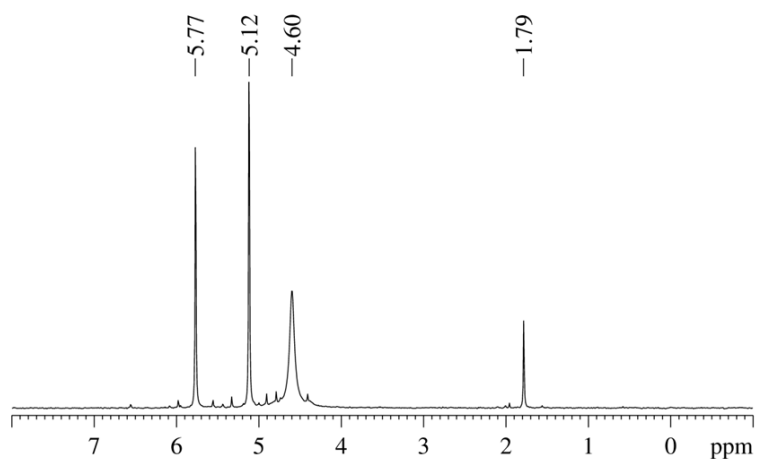

$^1\text{H}$  NMR (HMDS) $2\text{Mg}-2\text{AlCl}_3-\text{THF}$

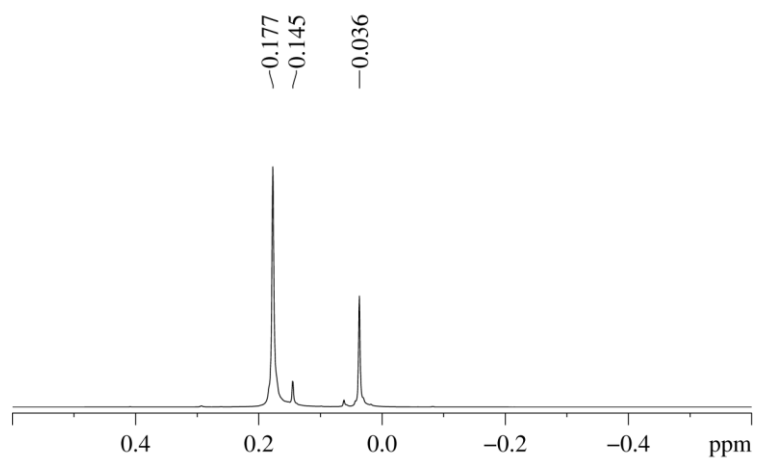

$^{13}\text{C}$  NMR (HMDS) $2\text{Mg}-2\text{AlCl}_3-\text{THF}$

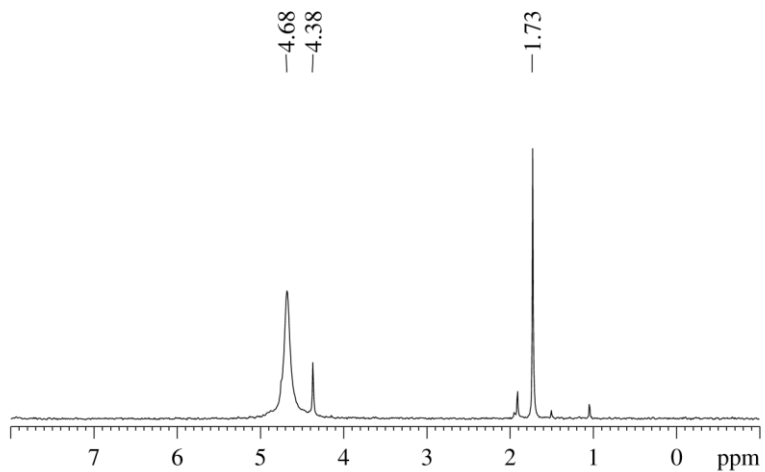

$^1\text{H NMR}$  [ $\text{Mg}_2\text{Cl}_3 \cdot 6\text{THF}$ ][ $\text{HMDSAICl}_3$ ]-THF

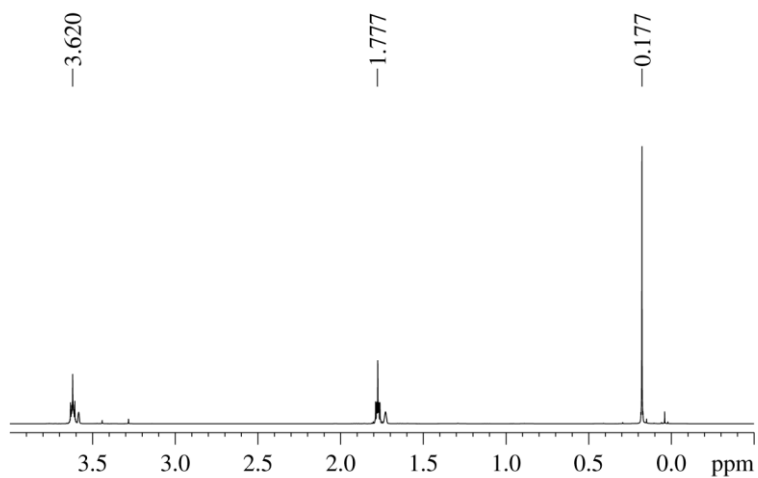

$^{13}\text{C NMR}$  [ $\text{Mg}_2\text{Cl}_3 \cdot 6\text{THF}$ ][ $\text{HMDSAICl}_3$ ]-THF

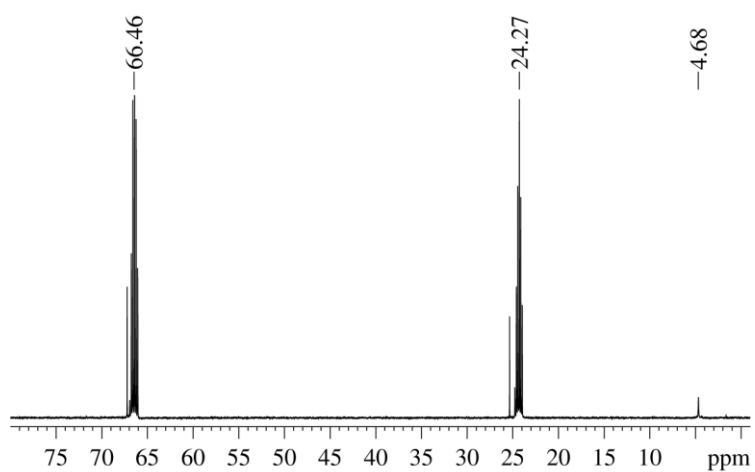

## MS Spectra of HMDSAICl<sub>2</sub>

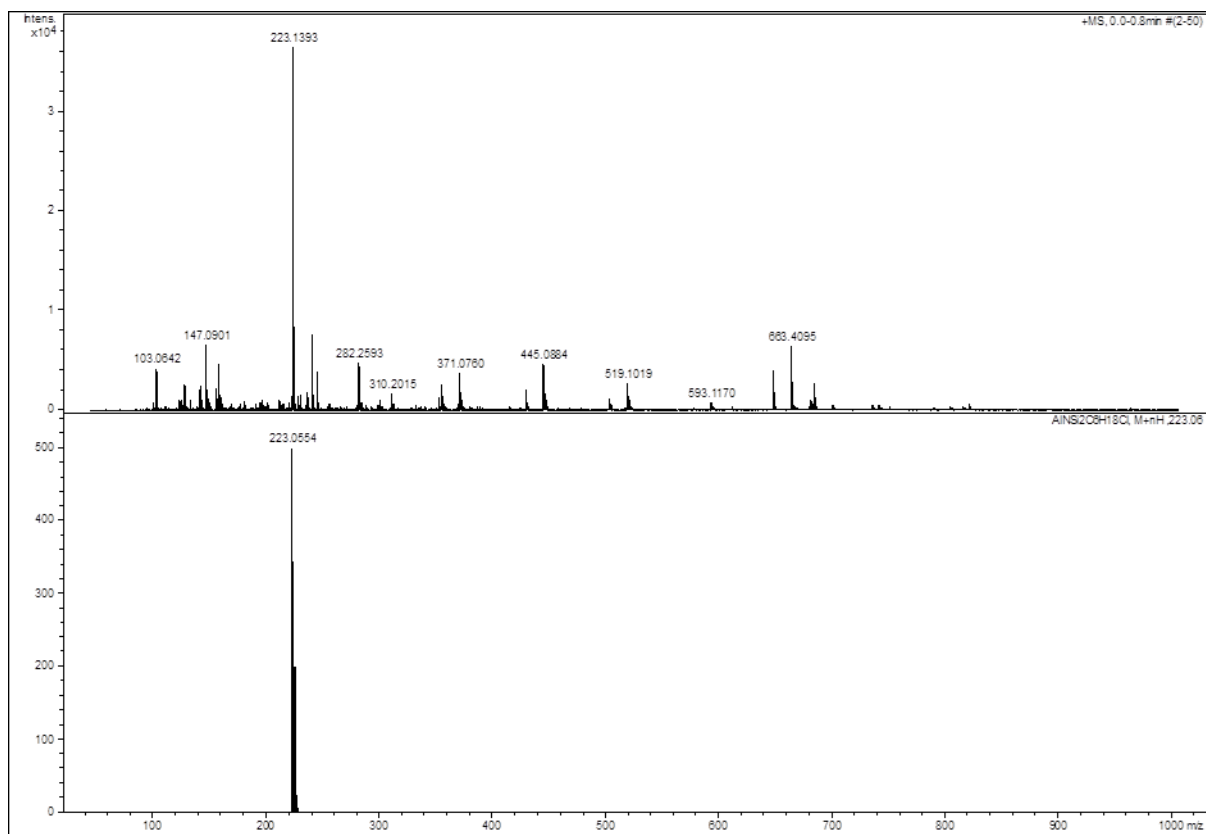

Supplement: c3ra43206h.pdf [file c3ra43206h.pdf]
